# Supplementary material for: The SLS-Berlin: Validation of a German Computer-Based Screening Test to Measure Reading Proficiency in Early and Late Adulthood
Source: PubMed Central journal article supplement (PMC6702301; doi:10.3389/fpsyg.2019.01682), 2019-08-14
Supplement: Table_1.pdf [file Table_1.pdf]

## *Supplementary Material*

### Test sentences used in the SLS-Berlin

| Sentence ID | Sentence                                                                              | Correct/Incorrect | Mean complexity Rating (1-5) |
|-------------|---------------------------------------------------------------------------------------|-------------------|------------------------------|
| 1           | Ein Nashorn ist ein Blechblasinstrument.                                              | incorrect         | 1                            |
| 2           | Mit einer Waage wird die Körpergröße einer Person gemessen.                           | incorrect         | 1.79                         |
| 3           | Wenn man regelmäßig ins Solarium geht, bekommt man eine blasse Hautfarbe.             | incorrect         | 2.16                         |
| 4           | Ein Mobiltelefon ist sehr praktisch, wenn man unterwegs telefonieren will.            | correct           | 1.74                         |
| 5           | Der Mond wurde vor etwa 200 Jahren vom Menschen besiedelt.                            | incorrect         | 1.63                         |
| 6           | Aus Sicherheitsgründen ist das Rauchen an Tankstellen verboten.                       | correct           | 1.53                         |
| 7           | Gegen Seekrankheit hilft eine Behandlung mit Blumendünger.                            | incorrect         | 1.74                         |
| 8           | Betrunkene Autofahrer haben eine verlangsamte Reaktionsgeschwindigkeit.               | correct           | 1.74                         |
| 9           | Gemüse sollte schonend zubereitet werden, damit die Vitamine erhalten bleiben.        | correct           | 2.11                         |
| 10          | Zum Treffen einer Jugendgruppe kommen hauptsächlich Senioren, um Schach zu spielen.   | incorrect         | 2.47                         |
| 11          | Mit einem Mobiltelefon kann man telefonieren und Kurznachrichten versenden.           | correct           | 1.95                         |
| 12          | Bestimmte Medikamente können nur gekauft werden, wenn der Arzt ein Rezept ausstellt.  | correct           | 1.79                         |
| 13          | In fünf Sterne Luxushotels muss man seinen eigenen Schlafsack mitnehmen.              | incorrect         | 2.26                         |
| 14          | Damit man berechtigt ist, ein Auto zu fahren, benötigt man einen Führerschein.        | correct           | 2                            |
| 15          | Einen Hamburger isst man, wenn man sich besonders gesund und bewusst ernähren möchte. | incorrect         | 2.21                         |
| 16          | Eine Röntgenuntersuchung ermöglicht es, einen Knochenbruch festzustellen.             | correct           | 1.95                         |
| 17          | Cornflakes sind knusprige Flocken aus zerkleinertem, geröstetem Straßensplitt.        | incorrect         | 2.11                         |
| 18          | Eine Sommergrippe ist eine Krankheit, die durch Radio hören übertragen werden kann.   | incorrect         | 2.26                         |
| 19          | Kinder, die eine außergewöhnliche Begabung haben, nennt man Wunderkinder.             | correct           | 2.21                         |
| 20          | Die Straßenverkehrsordnung wurde speziell für die Luftfahrt geschaffen.               | incorrect         | 1.75                         |

|    |                                                                                                      |           |      |
|----|------------------------------------------------------------------------------------------------------|-----------|------|
| 21 | Tennisspieler benötigen, um ihren Sport auszuüben, einen Swimmingpool oder einen Badese.             | incorrect | 2.84 |
| 22 | Um schmutzige Wäsche wieder sauber zu bekommen, gibt man sie in den Geschirrspüler.                  | incorrect | 2.21 |
| 23 | Bei Versandhäusern kann man die gewünschten Waren auch telefonisch bestellen.                        | correct   | 1.89 |
| 24 | Eine Gehirnerschütterung kann man bekommen, wenn man hart mit dem Kopf aufschlägt.                   | correct   | 2.16 |
| 25 | Unter Subtrahieren versteht man das Zusammenzählen von verschiedenen Zahlen.                         | incorrect | 2    |
| 26 | Wenn man an Grippe erkrankt ist, sollte man am besten im Bett bleiben und sich auskurieren.          | correct   | 2.32 |
| 27 | Mischt man die Farbe Blau und die Farbe Gelb zusammen, erhält man Grün.                              | correct   | 2.11 |
| 28 | Schädlingsbekämpfungsmittel können Gesundheitsschäden auslösen.                                      | correct   | 1.89 |
| 29 | Um als Arzt erfolgreich arbeiten zu können, ist eine hohe musikalische Begabung erforderlich.        | incorrect | 2.42 |
| 30 | Feinschmecker essen gerne köstliche Lebensmittel und trinken oft guten Wein zu ihrem Essen.          | correct   | 2.47 |
| 31 | Der Zentimeter ist eine sehr gebräuchliche Einheit zur Messung des Gewichts.                         | incorrect | 1.74 |
| 32 | Beim Auftreten von Vergiftungserscheinungen ist es ratsam, einen Arzt zu kontaktieren.               | correct   | 1.79 |
| 33 | In einem Labyrinth findet man gute Ausschilderungen, die zum Ziel führen.                            | incorrect | 2.42 |
| 34 | Das Fernsehen ist ein Massenmedium, das in praktisch jedem Haushalt zu finden ist.                   | correct   | 2.16 |
| 35 | Ein Hauptaufgabengebiet der Feuerwehr ist es, Brände zu legen.                                       | incorrect | 1.63 |
| 36 | Intoleranz legt jemand an den Tag, wenn er ein begabter Handwerker ist.                              | incorrect | 2.37 |
| 37 | Für Arbeiten in der Hochseefischerei trägt man am besten elegante Herrenkleidung.                    | incorrect | 2    |
| 38 | Für häufig benutzte Redewendungen ist unbedingt eine Haftpflichtversicherung abzuschließen.          | incorrect | 2.47 |
| 39 | Bei einer Bewerbung kann unter anderem ein Empfehlungsschreiben hilfreich sein.                      | correct   | 2    |
| 40 | Programme, die heimlich in Computer eindringen und diesen schachmatt setzen können, nennt man Viren. | correct   | 3.21 |
| 41 | Eine Straßenbahnhaltestelle ist ein beliebter Zwischenstopp für Kleinflugzeuge.                      | incorrect | 2    |
| 42 | In einem Krankenhaus sind rund um die Uhr viele Krankenpflegerinnen und Ärzte beschäftigt.           | correct   | 2.16 |
| 43 | Gardinen hängt man vor das Fenster, um andere daran zu hindern, Mittagessen zu kochen.               | incorrect | 2.53 |
| 44 | In jeden Verbandskasten gehören ein Fieberthermometer und eine Reiseschreibmaschine.                 | incorrect | 2.63 |

|    |                                                                                                                      |           |      |
|----|----------------------------------------------------------------------------------------------------------------------|-----------|------|
| 45 | Sonne und angenehme Temperaturen zeichnen eine Schlechtwetterperiode aus.                                            | incorrect | 2.05 |
| 46 | Die Aufgabe der Weltgesundheitsorganisation ist die Ausrichtung von Schönheitswettbewerben.                          | incorrect | 1.84 |
| 47 | Bei der Herstellung der elektronischen Bauteile von Computern ist höchste Präzision notwendig.                       | correct   | 2.26 |
| 48 | Um an einer Hochschule studieren zu können, benötigt man als Voraussetzung unbedingt eine Schreinerlehre.            | incorrect | 2.79 |
| 49 | Ein Lokomotivführer eines Hochgeschwindigkeitszuges sollte unbedingt ein Training im Schuhputzen absolvieren.        | correct   | 2.53 |
| 50 | Eine Anwendungsmöglichkeit von Fernbedienungen ist das Entzünden von Kerzen.                                         | incorrect | 2.05 |
| 51 | „Warenimport“ bedeutet, dass Güter aus dem Ausland eingeführt werden.                                                | correct   | 2.32 |
| 52 | Eine Oper beginnt normalerweise mit dem Spiel der Ouvertüre durch das Küchenteam.                                    | incorrect | 2.26 |
| 53 | Wenn man das Körpergewicht verringern will, dann sollte man die Kalorienzufuhr drosseln.                             | correct   | 2.28 |
| 54 | In lang anhaltenden Trockenperioden ist die Feuerwehr in erhöhter Alarmbereitschaft.                                 | correct   | 2.21 |
| 55 | Die Entstehungsgeschichte unserer Erde wird im Branchenverzeichnis anschaulich dargestellt.                          | incorrect | 2.05 |
| 56 | An den Hauptbahnhöfen großer Städte befinden sich oft Gepäckaufbewahrungen.                                          | correct   | 1.63 |
| 57 | Flüchtigkeitsfehler lassen sich durch aufmerksame Arbeit vermeiden.                                                  | correct   | 1.95 |
| 58 | Eine motorbetriebene Maschine, die Tragflächen hat und fliegen kann, nennt man Kaffeemaschine.                       | incorrect | 2.53 |
| 59 | Benutzerfreundliche Gebrauchsanleitungen erleichtern die Inbetriebnahme von technischen Geräten.                     | correct   | 2.37 |
| 60 | Bohrinseln, die Öl zu Tage fördern, befinden sich ausschließlich im Hochgebirge.                                     | incorrect | 2.37 |
| 61 | Ein beliebter Gesprächsgegenstand auf Generalversammlungen sind Indianergeschichten.                                 | incorrect | 1.89 |
| 62 | Strafverteidiger sind bei ihren Auftritten vor Gericht auf eine gute Gesangsbildung angewiesen.                      | incorrect | 2.74 |
| 63 | Aneinanderhängende Waggons, die von einer Lokomotive auf Eisenbahnschienen gezogen werden, nennt man Kinderwägen.    | incorrect | 2.68 |
| 64 | Die Kundenzufriedenheit hat in modernen Dienstleistungsunternehmen einen hohen Stellenwert.                          | correct   | 2.26 |
| 65 | In heißen Sommernächten können einem Moskitos mit ihrem Surren und ihrem Stechen den Schlaf rauben.                  | correct   | 3.16 |
| 66 | Um Umweltverschmutzung zu vermeiden, ist es sinnvoll den Müll zu trennen und öffentliche Verkehrsmittel zu benutzen. | correct   | 3.16 |
| 67 | Die einflussreichsten Informationsquellen für Zeitungsredaktionen sind oftmals Garderobenstände.                     | incorrect | 2.21 |
| 68 | Der Strom aus dem Elektrizitätswerk wird unter anderem über Hochspannungsleitungen geliefert.                        | correct   | 2.16 |

---

|    |                                                                                                                                             |           |      |
|----|---------------------------------------------------------------------------------------------------------------------------------------------|-----------|------|
| 69 | Alle mystischen Phänomene, die man optisch und akustisch wahrnehmen kann, werden üblicherweise in einem Reiseführer zusammengefasst.        | incorrect | 3.68 |
| 70 | Abenteuerlustige Menschen fahren gerne in weit entfernte und unbekannte Länder, um dort ihren Urlaub zu verbringen.                         | correct   | 2.79 |
| 71 | Von Versicherungsgesellschaften kann man Informationsmaterial über Hausratsversicherungen erhalten.                                         | correct   | 2.53 |
| 72 | Konzentrationsfähigkeit ist etwas, das man vor allen Dingen braucht, um der faszinierenden Tätigkeit des Schlafens nach zu gehen.           | incorrect | 3.58 |
| 73 | Vor jeder Operation findet ein Aufklärungsgespräch statt, in dem der Anästhesist über die Risiken von Ampelkreuzungen aufklärt.             | incorrect | 3.26 |
| 74 | In unwegsamem Gelände schützen feste Schuhe aus dickem Leder vor Verletzungen, indem sie das Sprunggelenk stützen.                          | correct   | 3.47 |
| 75 | Die schöne Geräuschkulisse von Hufgetrappel von Wildpferden kann man besonders häufig in Großstadtvierteln hören.                           | incorrect | 3.10 |
| 76 | Bei einem Symposium folgt dem Vortrag eines Referenten über kontroverse Inhalte gewöhnlich ein Wettrennen.                                  | incorrect | 3.05 |
| 77 | Bei sportlichen Aktivitäten empfehlen sich Kleidungsstücke aus funktionellen Materialien, die schnell trocknen und besonders reißfest sind. | correct   | 3    |

---
