# Supplementary material for: The SLS-Berlin: Validation of a German Computer-Based Screening Test to Measure Reading Proficiency in Early and Late Adulthood
Source: PubMed Central journal article supplement (PMC6702301; doi:10.3389/fpsyg.2019.01682), 2019-08-14
Supplement: Table_2.pdf [file Table_2.pdf]

## *Supplementary Material*

### Norm data for the SLS-Berlin

Percentile ranks indicating the percentage of persons from the comparison group with the same or a lower SLS-Berlin score for the whole norm sample, the two subsamples of younger and older adults and for age decades within the subsample of older adults

| SLS-Berlin Score | Age range | All      | Subgroups                 |                          | Age Decades within the Subgroup of Older Adults |                 |                |
|------------------|-----------|----------|---------------------------|--------------------------|-------------------------------------------------|-----------------|----------------|
|                  |           | (N=2148) | Younger Adults<br>(N=655) | Older Adults<br>(N=1493) | 60er<br>(N=663)                                 | 70er<br>(N=832) | 80er<br>(N=25) |
|                  |           | 16-88    | 16-59                     | 60-88                    | 60-69                                           | 70-79           | 80-88          |
| 19               |           | 0.05     | -                         | 0.07                     | 0.16                                            | -               | -              |
| 20               |           | -        | -                         | -                        | -                                               | -               | -              |
| 21               |           | 0.14     | -                         | 0.20                     | -                                               | 0.12            | 4              |
| 22               |           | 0.19     | -                         | 0.27                     | -                                               | 0.24            | -              |
| 23               |           | 0.23     | -                         | 0.33                     | -                                               | 0.36            | -              |
| 24               |           | -        | -                         | -                        | -                                               | -               | -              |
| 25               |           | -        | -                         | -                        | -                                               | -               | -              |
| 26               |           | 0.42     | -                         | 0.60                     | -                                               | 0.84            | -              |
| 27               |           | 0.51     | -                         | 0.74                     | 0.16                                            | 1.08            | -              |
| 28               |           | 0.65     | 0.15                      | 0.87                     | 0.31                                            | 1.20            | -              |
| 29               |           | 0.98     | 0.31                      | 1.27                     | 0.79                                            | 1.56            | -              |
| 30               |           | 1.16     | -                         | 1.54                     | 1.10                                            | 1.68            | 8              |
| 31               |           | 1.49     | 0.46                      | 1.94                     | 1.26                                            | 2.16            | 12             |
| 32               |           | 2.00     | 1.07                      | 2.41                     | 1.89                                            | 2.52            | 12             |
| 33               |           | 2.28     | -                         | 2.81                     | 2.20                                            | 3.00            | 12             |
| 34               |           | 2.75     | 1.22                      | 3.42                     | 2.36                                            | 3.97            | 12             |
| 35               |           | 3.26     | -                         | 4.15                     | 2.83                                            | 4.93            | 12             |
| 36               |           | 4.24     | 1.83                      | 5.29                     | 3.30                                            | 6.49            | 16             |
| 37               |           | 5.07     | 2.14                      | 6.36                     | 3.77                                            | 7.81            | 24             |
| 38               |           | 6.66     | 3.05                      | 8.24                     | 5.35                                            | 9.98            | 24             |
| 39               |           | 8.10     | 4.43                      | 9.71                     | 6.45                                            | 11.78           | 24             |
| 40               |           | 9.40     | 4.58                      | 11.52                    | 7.86                                            | 13.94           | 24             |
| 41               |           | 11.22    | 5.80                      | 13.60                    | 9.12                                            | 16.71           | 24             |
| 42               |           | 13.50    | 6.41                      | 16.61                    | 11.48                                           | 20.31           | 24             |
| 43               |           | 15.32    | 7.18                      | 18.89                    | 13.99                                           | 22.48           | 24             |
| 44               |           | 17.50    | 9.16                      | 21.17                    | 16.35                                           | 24.76           | 24             |

---

|    |        |        |        |        |        |     |
|----|--------|--------|--------|--------|--------|-----|
| 45 | 20.11  | 11.30  | 23.98  | 18.87  | 27.88  | 24  |
| 46 | 22.67  | 13.13  | 26.86  | 21.38  | 31.01  | 28  |
| 47 | 25.47  | 15.27  | 29.94  | 23.58  | 34.86  | 28  |
| 48 | 28.21  | 17.10  | 33.09  | 26.57  | 38.22  | 28  |
| 49 | 31.19  | 18.93  | 36.57  | 29.87  | 41.83  | 32  |
| 50 | 33.94  | 21.53  | 39.38  | 32.39  | 44.95  | 32  |
| 51 | 36.87  | 24.12  | 42.46  | 35.53  | 48.08  | 32  |
| 52 | 40.08  | 27.33  | 45.68  | 38.52  | 51.44  | 36  |
| 53 | 42.88  | 31.15  | 48.02  | 41.35  | 53.49  | 36  |
| 54 | 46.18  | 34.50  | 51.31  | 44.34  | 56.73  | 48  |
| 55 | 49.30  | 36.79  | 54.79  | 48.27  | 59.86  | 52  |
| 56 | 52.19  | 39.54  | 57.74  | 51.26  | 62.62  | 60  |
| 57 | 55.26  | 42.44  | 60.88  | 53.46  | 66.34  | 68  |
| 58 | 58.61  | 45.95  | 64.17  | 57.86  | 68.87  | 68  |
| 59 | 61.82  | 48.40  | 67.72  | 61.64  | 72.36  | 68  |
| 60 | 64.25  | 50.99  | 70.06  | 63.84  | 74.88  | 68  |
| 61 | 66.95  | 53.89  | 72.67  | 66.67  | 77.28  | 72  |
| 62 | 70.34  | 57.56  | 75.95  | 70.28  | 80.41  | 72  |
| 63 | 73.04  | 59.85  | 78.83  | 73.27  | 83.05  | 80  |
| 64 | 76.07  | 62.44  | 82.05  | 76.89  | 86.06  | 80  |
| 65 | 78.40  | 64.89  | 84.33  | 80.03  | 87.62  | 84  |
| 66 | 80.63  | 67.48  | 86.40  | 82.08  | 89.78  | 84  |
| 67 | 83.47  | 70.99  | 88.95  | 85.69  | 91.59  | 84  |
| 68 | 85.01  | 73.44  | 90.09  | 86.79  | 92.55  | 92  |
| 69 | 86.87  | 76.34  | 91.49  | 88.21  | 93.99  | 92  |
| 70 | 89.11  | 79.39  | 93.37  | 90.88  | 95.31  | 92  |
| 71 | 91.20  | 82.90  | 94.84  | 93.24  | 96.15  | 92  |
| 72 | 92.50  | 85.04  | 95.78  | 94.34  | 96.99  | 92  |
| 73 | 93.99  | 87.79  | 96.72  | 95.28  | 97.84  | 96  |
| 74 | 95.58  | 90.53  | 97.79  | 96.70  | 98.56  | 100 |
| 75 | 97.21  | 93.89  | 98.66  | 97.96  | 99.16  | -   |
| 76 | 98.65  | 96.79  | 99.46  | 98.74  | 100.00 | -   |
| 77 | 100.00 | 100.00 | 100.00 | 100.00 | -      | -   |

---
